# Supplementary material for: Impact of horizontal resolution on global ocean-sea-ice model simulations based on the experimental protocols of the Ocean Model Intercomparison Project phase 2 (OMIP-2)
Source: Copernicus journal article supplement (doi:10.5194/gmd-2019-374), 2020-03-11
Supplement: Supplementary file 1 [file gmd-2019-374-supplement.pdf]

S1 Introduction of supplement

This document contains supplemental materials of the paper by Chassignet et al. “Impact of horizontal resolution on global ocean-sea-ice model simulations based on the experimental protocols of the Ocean Model Intercomparison Project phase 2 (OMIP-2)” submitted for possible publication in Geoscientific Model Development.

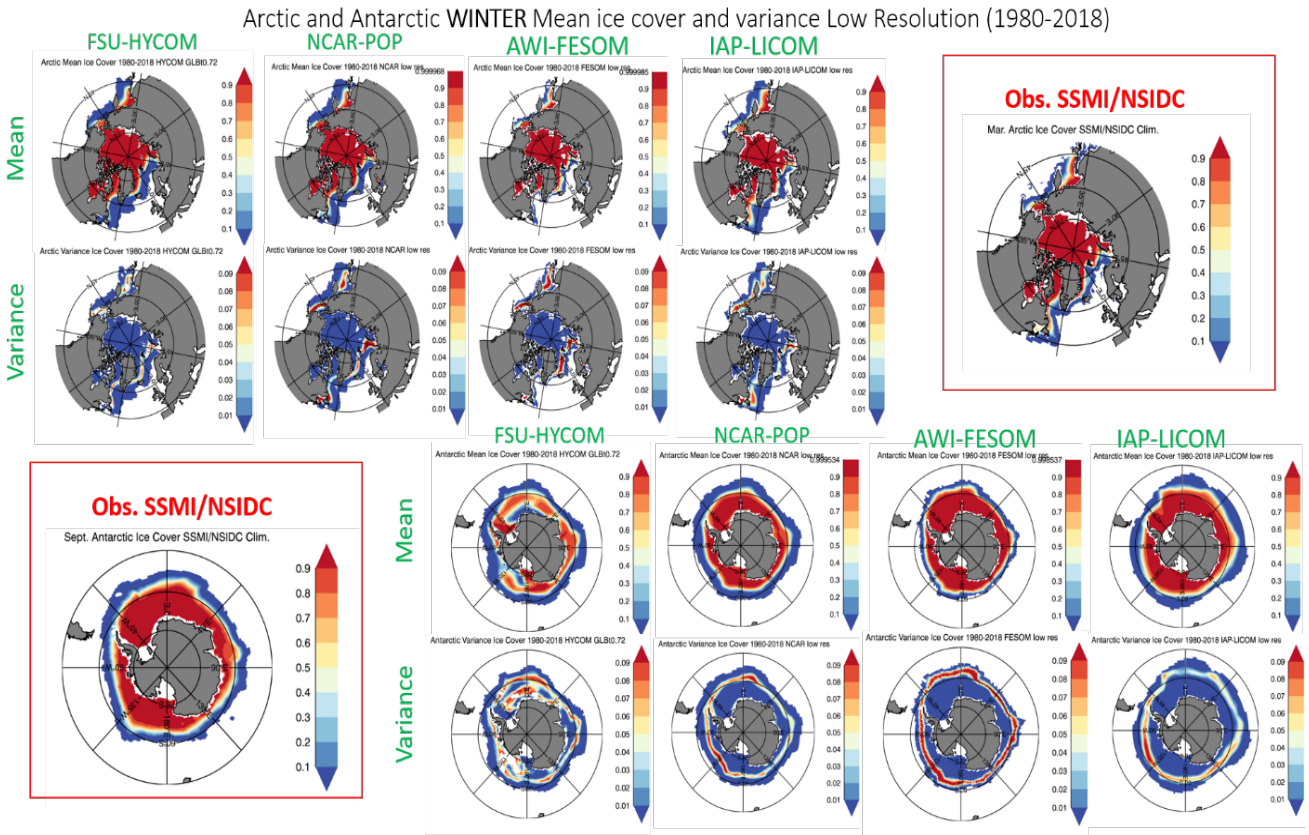

Figure S1: Arctic and Antarctic winter mean ice cover and variance for the low-resolution experiments

Arctic and Antarctic WINTER Mean ice cover and variance High Resolution (1980-2018)

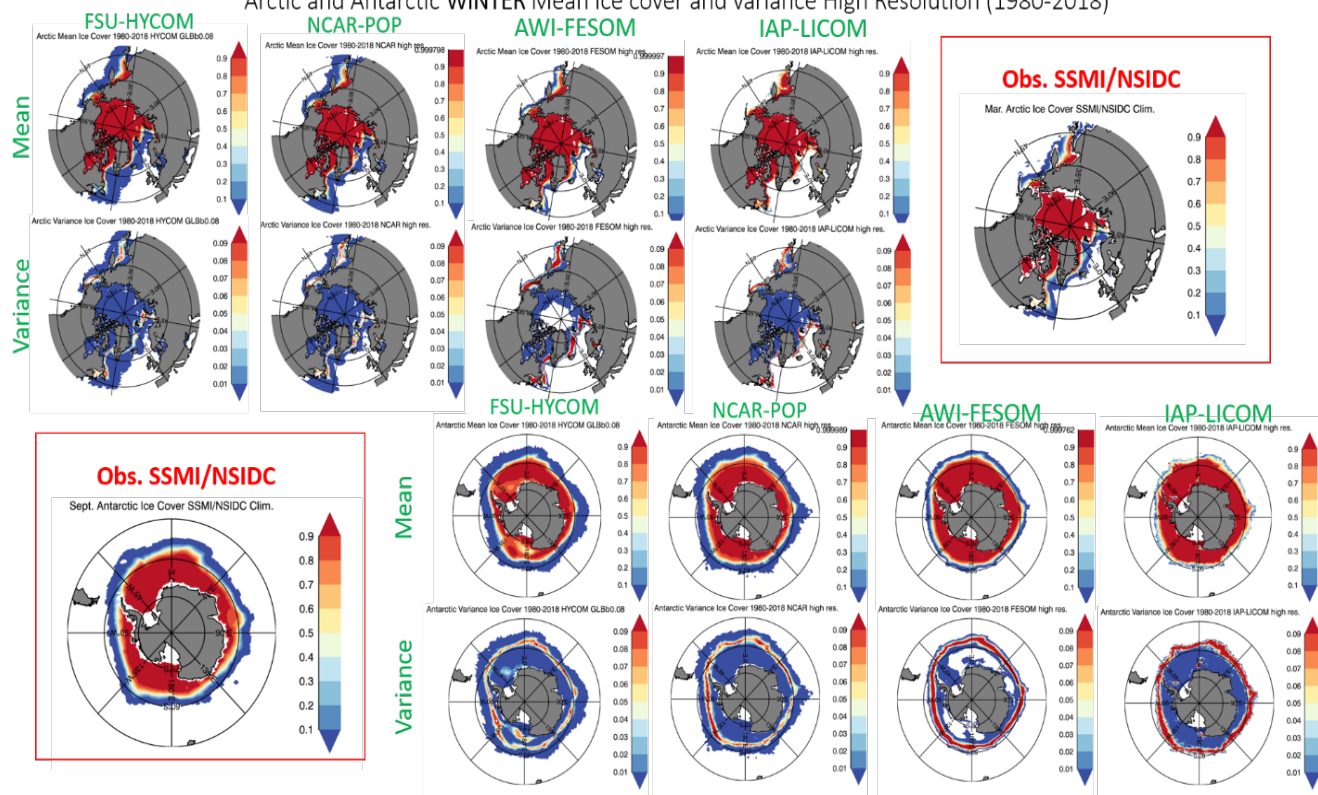

Figure S2: Arctic and Antarctic winter mean ice cover and variance for the high-resolution experiments

Arctic and Antarctic SUMMER Mean ice cover and variance Low Resolution (1980-2018)

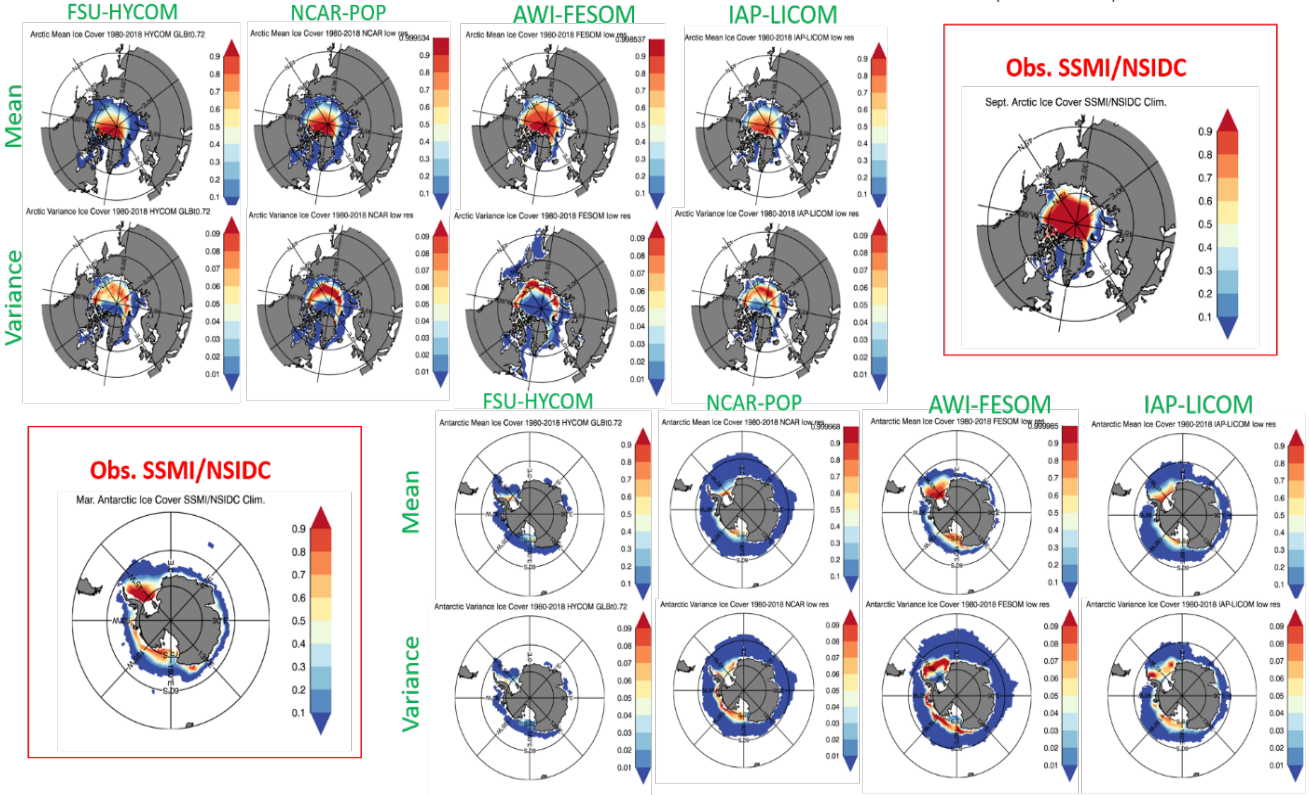

15

Figure S3: Arctic and Antarctic summer mean ice cover and variance for the low-resolution experiments

Arctic and Antarctic SUMMER Mean ice cover and variance High Resolution (1980-2018)

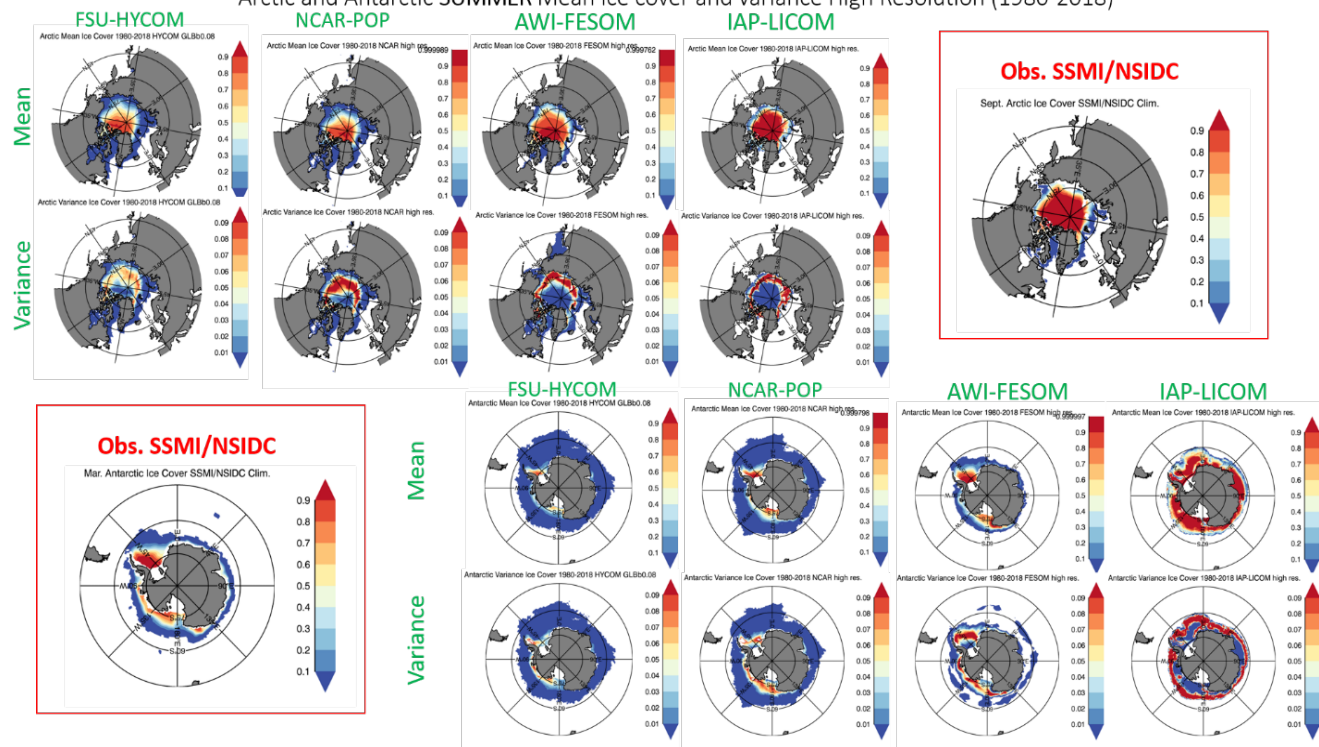

20 Figure S4: Arctic and Antarctic summer mean ice cover and variance for the high-resolution experiments

# Arctic and Antarctic WINTER Mean ice thickness and variance Low Resolution (1980-2018)

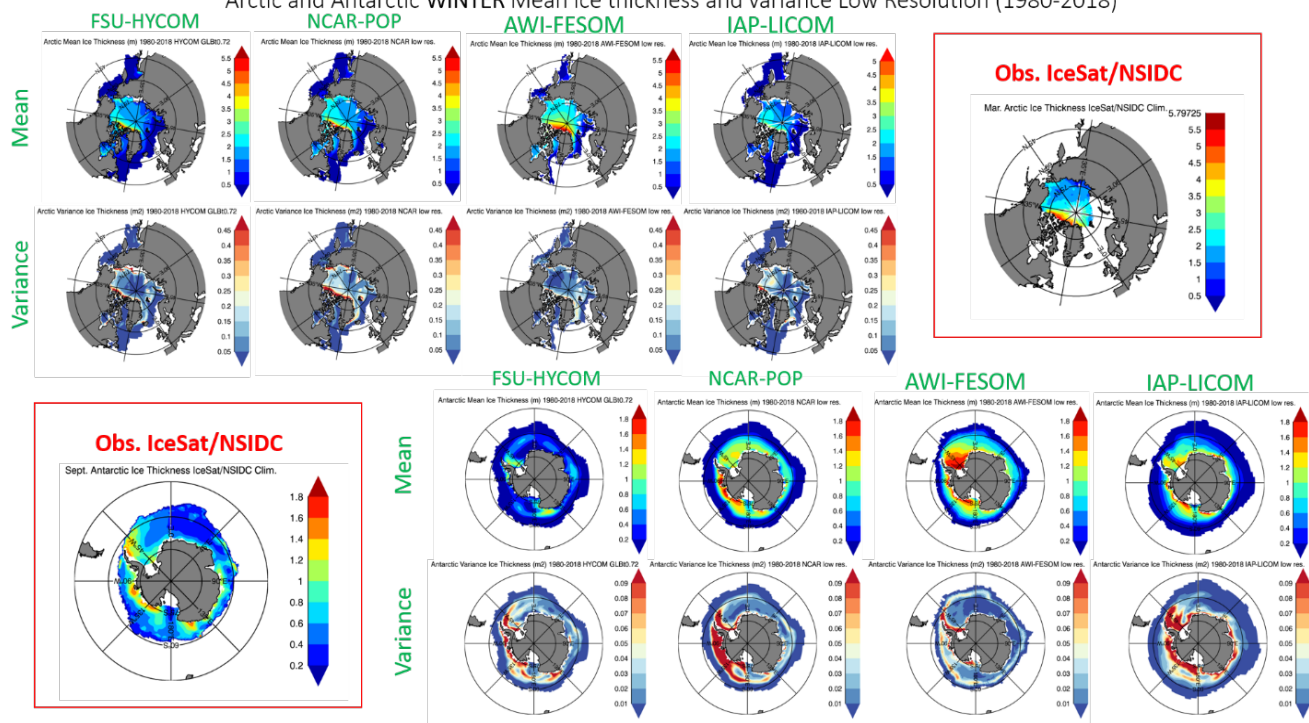

25 **Figure S5: Arctic and Antarctic winter mean ice thickness and variance for the low-resolution experiments**

Arctic and Antarctic WINTER Mean ice thickness and variance High Resolution (1980-2018)

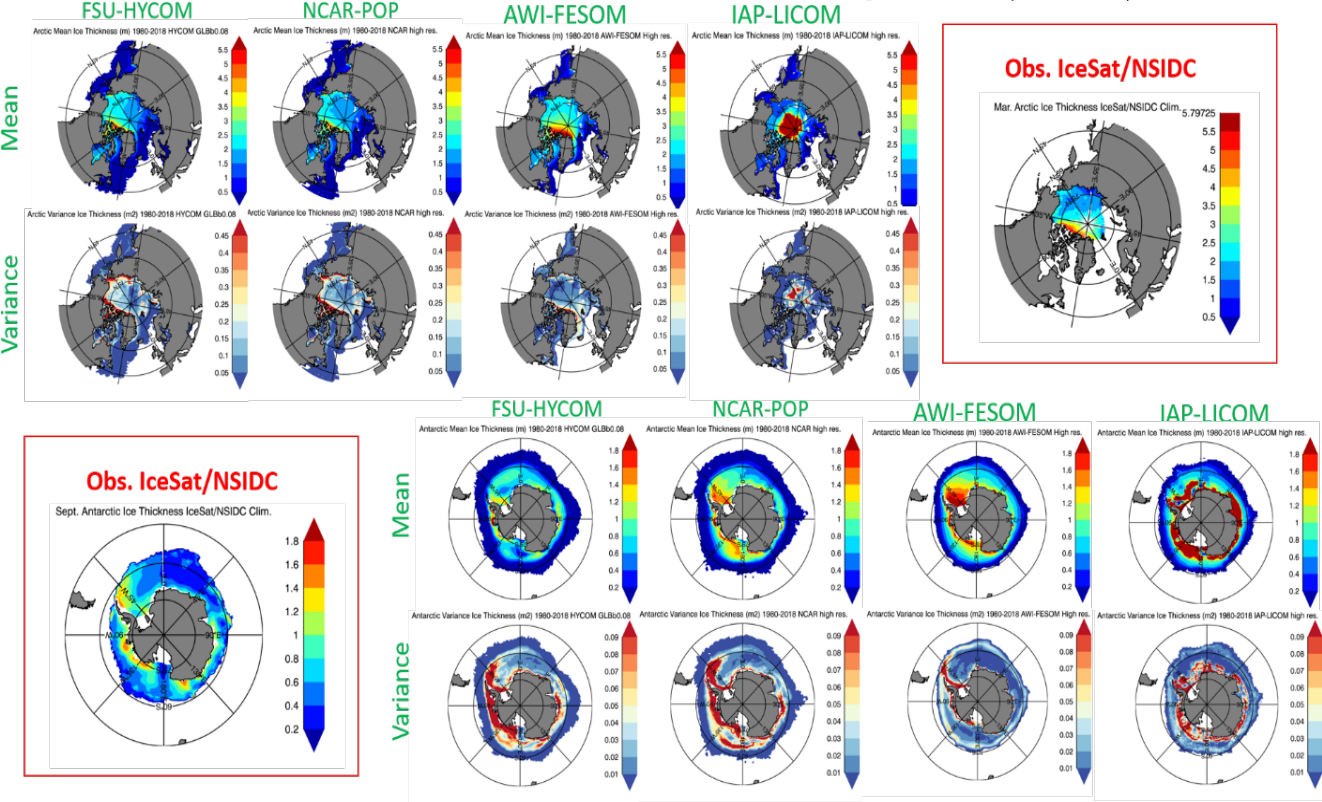

30 Figure S6: Arctic and Antarctic winter mean ice thickness and variance for the high-resolution experiments

# Arctic and Antarctic SUMMER Mean ice thickness and variance Low Resolution (1980-2018)

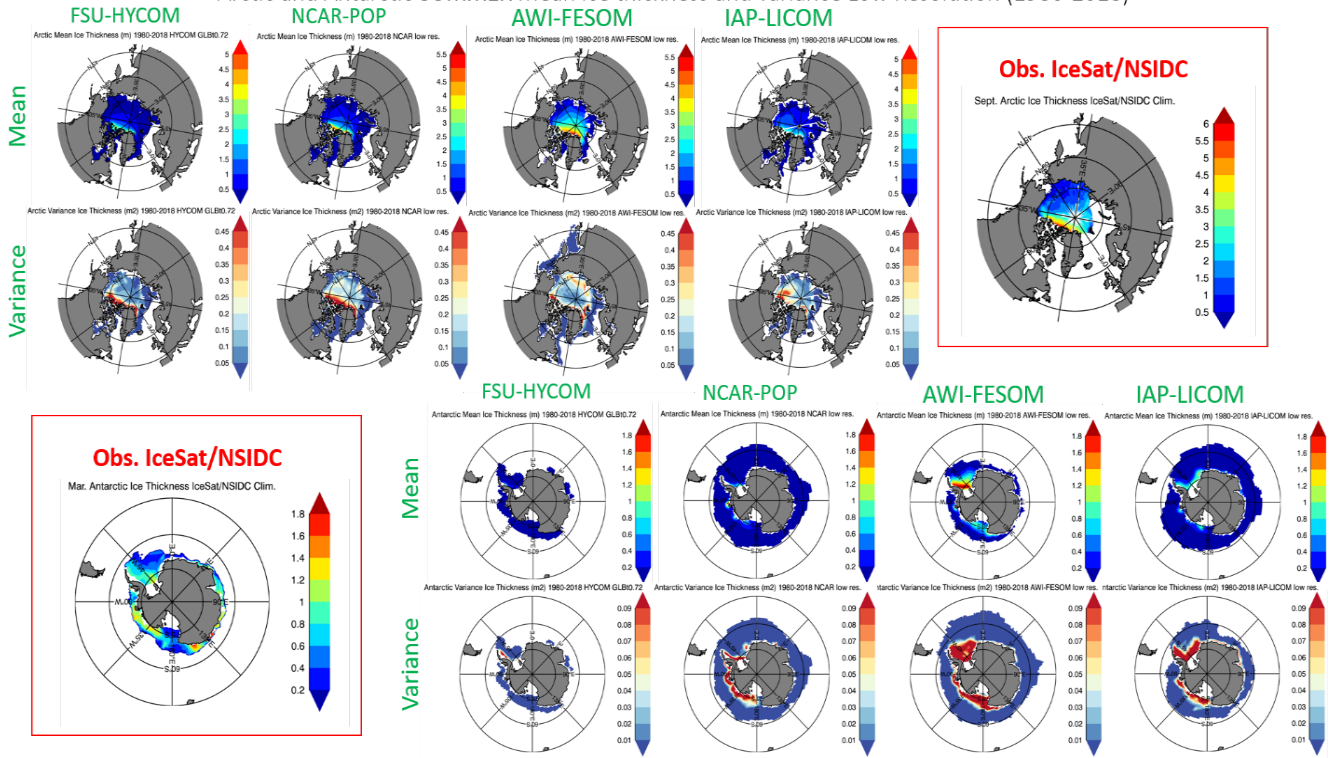

35 **Figure S7: Arctic and Antarctic summer mean ice thickness and variance for the low-resolution experiments**

Arctic and Antarctic SUMMER Mean ice thickness and variance High Resolution (1980-2018)

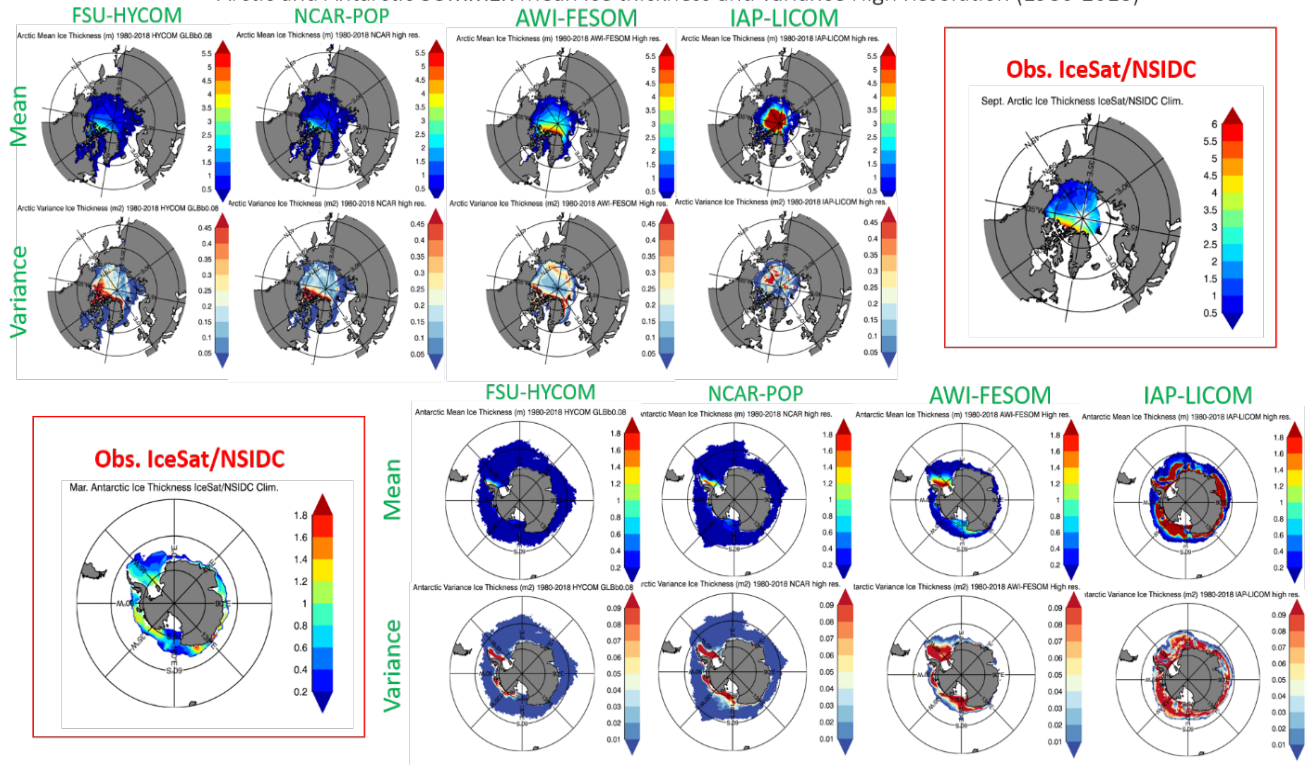

40 Figure S8: Arctic and Antarctic summer mean ice thickness and variance for the high-resolution experiments

|                          |                                                                         |
|--------------------------|-------------------------------------------------------------------------|
| Variables                | Input4MIPS datasets                                                     |
| Specific Humidity        | <b>input4MIPs.CMIP6.OMIP.MRI.MRI-JRA55-do-1-4-0.atmos.3hrPt.huss.gr</b> |
| Precipitation solid      | <b>input4MIPs.CMIP6.OMIP.MRI.MRI-JRA55-do-1-4-0.atmos.3hr.prsn.gr</b>   |
| Precipitation liquid     | <b>input4MIPs.CMIP6.OMIP.MRI.MRI-JRA55-do-1-4-0.atmos.3hr.prra.gr</b>   |
| Longwave down radiation  | <b>input4MIPs.CMIP6.OMIP.MRI.MRI-JRA55-do-1-4-0.atmos.3hr.rlds.gr</b>   |
| Shortwave down radiation | <b>input4MIPs.CMIP6.OMIP.MRI.MRI-JRA55-do-1-4-0.atmos.3hr.rsds.gr</b>   |
| Air temperature          | <b>input4MIPs.CMIP6.OMIP.MRI.MRI-JRA55-do-1-4-0.atmos.3hrPt.tas.gr</b>  |
| U10                      | <b>input4MIPs.CMIP6.OMIP.MRI.MRI-JRA55-do-1-4-0.atmos.3hrPt.uas.gr</b>  |
| V10                      | <b>input4MIPs.CMIP6.OMIP.MRI.MRI-JRA55-do-1-4-0.atmos.3hrPt.vas.gr</b>  |
| Rivers                   | <b>input4MIPs.CMIP6.OMIP.MRI.MRI-JRA55-do-1-4-0.land.day.friver.gr</b>  |

**Table1: Input4MIPS datasets**
